# Supplementary material for: Z-Scheme Mo2C/MoS2/In2S3 dual-heterojunctions for the photocatalytic reduction of Cr(vi)
Source: Royal Society of Chemistry journal article supplement (doi:10.1039/d1ta00999k), 2021-01-01
Supplement: d1ta00999k1.pdf [file d1ta00999k1.pdf]

## Supplementary Material

### Z-scheme Mo<sub>2</sub>C/MoS<sub>2</sub>/In<sub>2</sub>S<sub>3</sub> Dual-heterojunction for Photocatalytic Reduction of Cr(VI)

Xin Zhang<sup>a, 1</sup>, Fenyang Tian<sup>a, 1</sup>, Longyu Qiu<sup>a, 1</sup>, Manyi Gao<sup>a</sup>, Weiwei Yang<sup>a\*</sup>, Yequn Liu<sup>b</sup>,

Yongsheng Yu<sup>a\*</sup>

<sup>a</sup>MIIT Key Laboratory of Critical Materials Technology for New Energy Conversion and Storage, School of Chemistry and Chemical Engineering, Harbin Institute of Technology, Harbin, Heilongjiang 150001, China.

<sup>b</sup>Institutional Center for Shared Technologies and Facilities of Institute of Coal Chemistry, CAS, State Key Laboratory of Coal Conversion, Taiyuan 030001, China

\*To whom correspondence should be addressed. Email: yangww@hit.edu.cn, and ysyu@hit.edu.cn

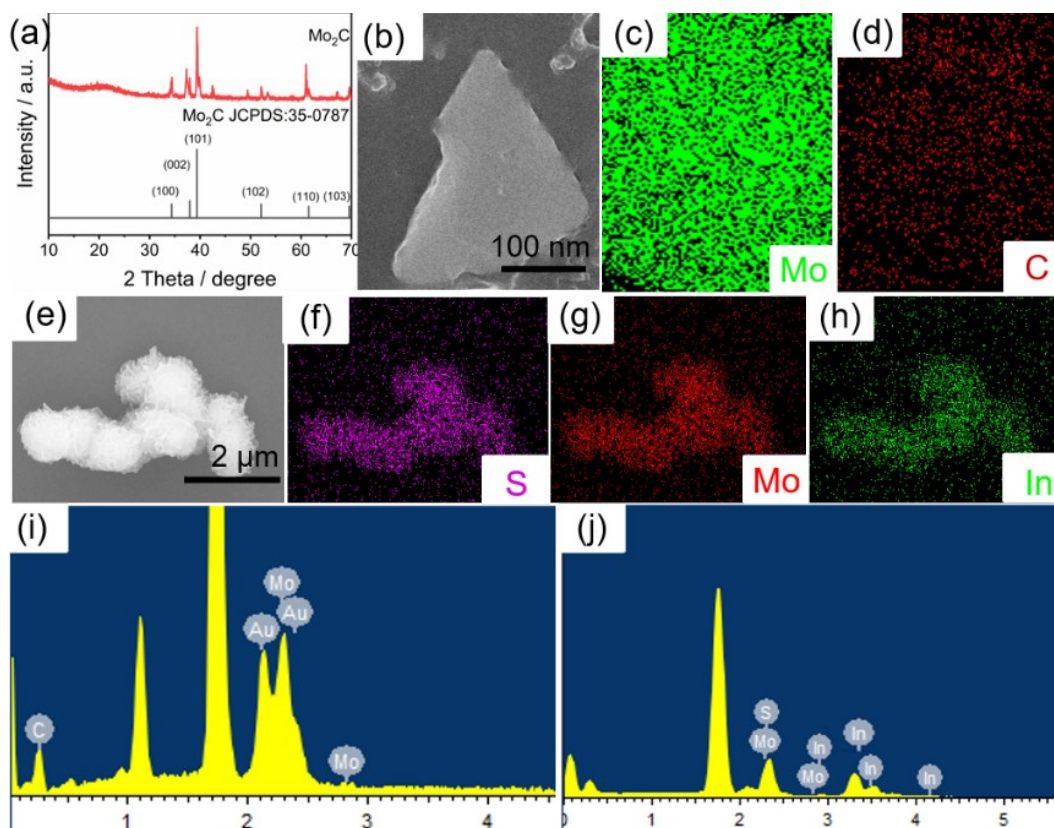

**Figure S1.** (a) XRD pattern of  $\text{Mo}_2\text{C}$ . (b) FESEM image of MNs and mappings of Mo (c) and C (d). (e) FESEM image of MIS and mappings of S (f), Mo (g) and In (h), (b) EDS images of MNs (i) and MIS (j).

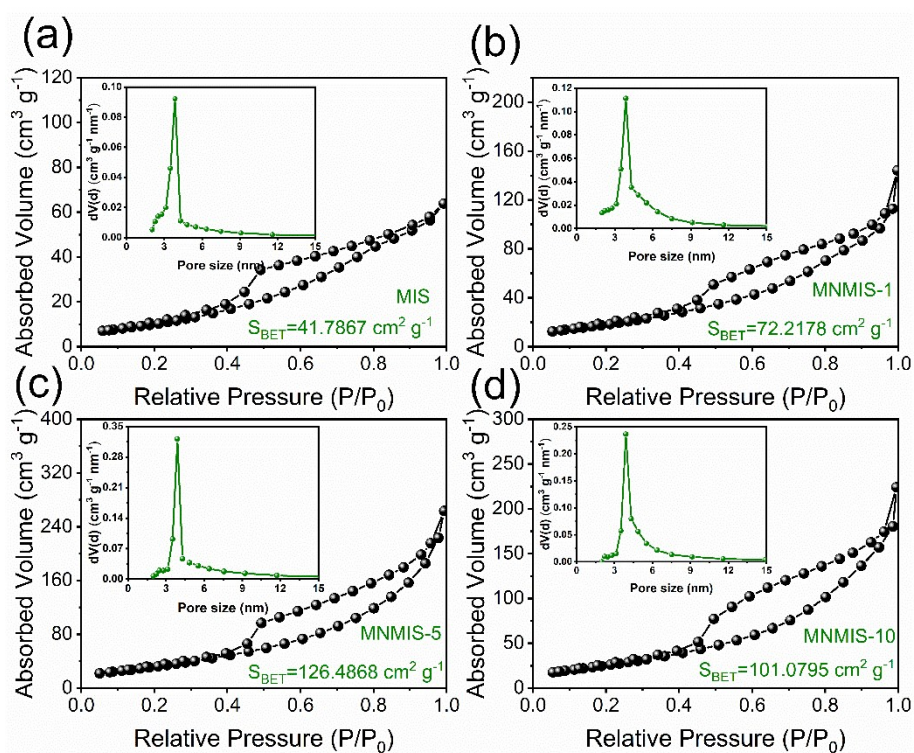

**Figure S2.**  $\text{N}_2$  adsorption-desorption isotherms and corresponding pore size distribution curves (inset) of MIS, MNMIS-1, MNMIS-5 and MNMIS-10 heterojunctions.

**Table S1.** Specific surface area, pore volume of as-prepared samples.

| Sample   | $S_{\text{BET}} / (\text{m}^2 \text{g}^{-1})$ | Pore volume / ( $\text{mg L}^{-1}$ ) |
|----------|-----------------------------------------------|--------------------------------------|
| MIS      | 41.7867                                       | 0.09888                              |
| MNMIS-1  | 72.2178                                       | 0.2229                               |
| MNMIS-5  | 126.4868                                      | 0.4077                               |
| MNMIS-10 | 101.0795                                      | 0.3464                               |

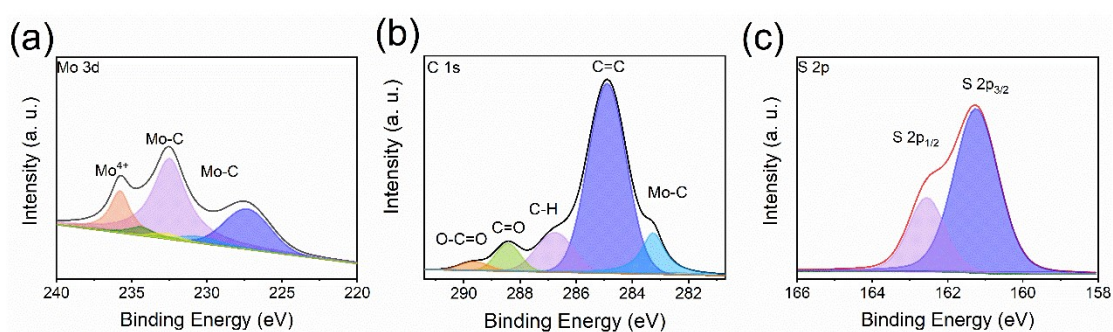

**Figure S3.** High-resolution XPS of Mo 3d, C 1s and S 2p spectra of MNMIS-5 heterojunction.

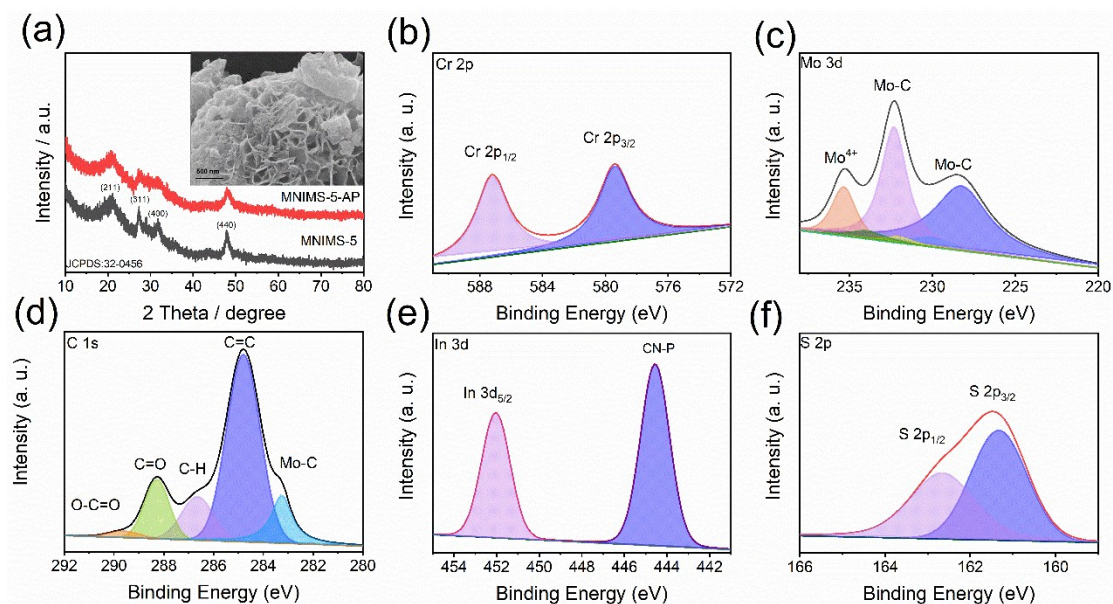

**Figure S4.** (a) XRD pattern of MNMIS-5 and MNMIS-5-AP and SEM image of MNMIS-5-AP (insert). High-resolution XPS of (b) Cr 2p, (c) Mo 3d, (d) C 1s, (e) In 3d and (f) S 2p spectra of MNMIS-5-AP.
